# Supplementary material
Source: PubMed Central journal article supplement (PMC4704876)
Supplement: supp_2015-0127_Supplemental_Figure.pdf [file supp_2015-0127_Supplemental_Figure.pdf]

INITIAL EVALUATION FORM: STOMATITIS DISEASE ACTIVITY INDEX

PATIENT: \_\_\_\_\_

DATE: \_\_\_\_\_

WEIGHT TODAY: \_\_\_\_\_

DIET: \_\_\_\_\_

CLIENT REPORT: Please evaluate the following (circle one number for each of the following criteria):

**Appetite:** 3 = eats only pureed food, or only when hand fed 2 = eats wet food on his/her own; cannot eat dry food 1 = eating wet and dry food, but less than normal amount 0 = eating normally

**Activity level:** 3 = no interest in people or other pets, spends most of time sleeping 2 = low activity level, but will play occasionally when engaged by people or other pets 1 = plays spontaneously, but not frequently 0 = normal activity level (playful and active)

**Grooming behavior:** 3 = will not groom 2 = grooms occasionally but not at 'pre-illness' level 1 = grooming excessively 0 = grooming normally

**Perceived comfort:** On a scale of 0-3, with 0 being most comfortable and 3 being most painful, rank your cat's present comfort level: \_\_\_\_\_

CLINICIAN EVALUATION:

| STOMATITIS DISEASE ACTIVITY INDEX                    | 0 | 1 | 2 | 3 |
|------------------------------------------------------|---|---|---|---|
| Owner evaluation                                     |   |   |   |   |
| Weight                                               |   |   |   |   |
| Maxillary buccal mucosal inflammation                |   |   |   |   |
| Mandibular buccal mucosal inflammation               |   |   |   |   |
| Maxillary attached gingival inflammation             |   |   |   |   |
| Mandibular attached gingival inflammation            |   |   |   |   |
| Molar salivary gland inflammation                    |   |   |   |   |
| Inflammation of areas lateral to palatoglossal folds |   |   |   |   |
| Oropharyngeal inflammation                           |   |   |   |   |
| Lingual and/or sublingual inflammation               |   |   |   |   |
| <b>TOTAL SCORE (maximum = 30)</b>                    |   |   |   |   |

Owner evaluation: average of the circled values above

Weight: 0 = gain  $\geq 0.5$ kg 1 = gain  $\geq 0.25$ kg but  $< 0.5$ kg 2 =  $< 0.25$ kg gain  
3 = weight loss (if lost  $> 0.5$ kg compared with most recent visit)

Inflammation of oral cavity sites: 0 = none 1 = mild 2 = moderate 3 = severe
